# Supplementary material
Source: PubMed Central journal article supplement (PMC3457442)
Supplement: JCM.01405-12_zjm999091967so1.pdf [file JCM.01405-12_zjm999091967so1.pdf]

1 **SUPPLEMENTAL TABLES**

2 SUPPLEMENTAL TABLE 1 Current standard identification protocol (standard-protocol) by  
 3 organism-group

| <b>Organism-group</b>     | <b>Primary Methods</b>                                                     | <b>Secondary Methods</b>                                     |
|---------------------------|----------------------------------------------------------------------------|--------------------------------------------------------------|
| <i>S. aureus</i>          | LA <sup>a</sup> , PHX <sup>b</sup>                                         | Tube coagulase, thermonuclease,<br>biochemicals <sup>c</sup> |
| Other Staph <sup>d</sup>  | LA <sup>a</sup> , PHX <sup>b</sup>                                         | Tube coagulase, thermonuclease,<br>biochemicals <sup>c</sup> |
| BHS <sup>e</sup>          | LA <sup>a</sup> , catalase, PYR, bacitracin                                | Hippurate, manual system <sup>f</sup>                        |
| VGS <sup>g</sup>          | PYR, catalase, optochin,<br>biochemicals <sup>c</sup>                      | Manual system <sup>f</sup>                                   |
| <i>S. anginosus</i>       | PYR, catalase, biochemicals <sup>c</sup>                                   | Manual system <sup>f</sup> , sequencing <sup>h</sup>         |
| <i>S. pneumoniae</i>      | Optochin, PHX <sup>b</sup>                                                 | LA <sup>a</sup> test, quellung                               |
| Other GPC <sup>i</sup>    | PYR, LAP, catalase,<br>vancomycin, microdase,<br>biochemicals <sup>c</sup> | GLC <sup>j</sup>                                             |
| <i>Enterococcus</i> sp.   | PYR, catalase, PHX <sup>b</sup>                                            | Biochemicals <sup>c</sup>                                    |
| Enterobacteriaceae        | Indole, TSI, PHX <sup>b</sup>                                              | Manual system <sup>f</sup> , biochemicals <sup>c</sup>       |
| <i>P. aeruginosa</i>      | Oxidase, TSI, PHX <sup>b</sup>                                             | Biochemicals <sup>c</sup> , GLC <sup>j</sup>                 |
| Other NF GNB <sup>k</sup> | Oxidase, TSI, PHX <sup>b</sup>                                             | Biochemicals <sup>c</sup> , GLC <sup>j</sup>                 |
| <i>Haemophilus</i> sp.    | Differential media <sup>l</sup>                                            | Porphyrin test, XV Strip, GLC <sup>j</sup>                   |
| Other GNGB <sup>m</sup>   | Butyrate hydrolysis, oxidase,                                              | GLC <sup>j</sup>                                             |

|                            |                                                                                                                               |                                                                                             |
|----------------------------|-------------------------------------------------------------------------------------------------------------------------------|---------------------------------------------------------------------------------------------|
|                            | indole, PHX <sup>b</sup>                                                                                                      |                                                                                             |
| <i>Corynebacterium</i> sp. | Catalase, PHX <sup>b</sup> , GLC, manual system <sup>f</sup>                                                                  | Sequencing <sup>h</sup>                                                                     |
| Other GPR <sup>n</sup>     | Catalase, oxidase, GLC                                                                                                        | Sequencing <sup>h</sup>                                                                     |
| Anaerobic GN <sup>o</sup>  | Vancomycin, kanamycin, colistin, nitrate, BBE, catalase, aerotolerance                                                        | Manual system <sup>f</sup> , GLC <sup>j</sup>                                               |
| Anaerobic GP <sup>p</sup>  | Vancomycin, SPS, catalase, indole, aerotolerance                                                                              | Manual system <sup>f</sup> , GLC <sup>j</sup>                                               |
| <i>C. albicans</i>         | Germ-tube production                                                                                                          | Sugar assimilation and fermentation, morphology on cornmeal agar, biochemicals <sup>c</sup> |
| Other <i>Candida</i> sp.   | Sugar assimilation and fermentation, morphology on cornmeal agar, biochemicals <sup>c</sup> , differential media <sup>l</sup> | Manual system <sup>f</sup> , sequencing <sup>h</sup>                                        |
| Other yeasts               | Sugar assimilation and fermentation, morphology on cornmeal agar, biochemicals <sup>c</sup> , differential media <sup>l</sup> | Manual system <sup>f</sup> , sequencing <sup>h</sup>                                        |

4 <sup>a</sup> LA, latex agglutination kit. These include: Prolex Blue Staph kit (Pro-Lab Diagnostics), Prolex  
5 Streptococcal Grouping kit (Pro-Lab Diagnostics), and BBL Pneumoslide (BD Diagnostics).

6 <sup>b</sup> PHX, Phoenix automated microbial identification system (BD Diagnostics).

7 <sup>c</sup> Biochemicals, manual tube biochemical tests (multiple manufacturers).

8 <sup>d</sup> Other Staph, Staphylococci other than *S. aureus*. Species level identification required for *S.*  
9 *epidermidis*, *S. lugdunensis*, and *S. saprophyticus*.

10 <sup>e</sup> BHS, Beta-hemolytic *Streptococcus*.

11 <sup>f</sup> Manual identification system, Non-automated commercial identification systems. These  
12 include: API 20C AUX (Biomerieux, Durham NC), API 20E (Biomerieux), API Coryne  
13 (Biomerieux), Remel RapID ANA II (Thermo Fisher Scientific, Lenexa KS), and Remel RapID  
14 STR system (Thermo Fisher Scientific).

15 <sup>g</sup> VGS, Viridans-group *Streptococcus*.

16 <sup>h</sup> Sequencing, 16S rRNA gene and ITS sequencing (Applied Biosystems).

17 <sup>i</sup> GPC, Gram-positive cocci.

18 <sup>j</sup> Gas-liquid chromatography (GLC) (MIDI, Inc).

19 <sup>k</sup> NF GNB, Glucose non-fermenting gram-negative bacilli.

20 <sup>l</sup> Differential media, Commercial selective and differential media. This includes BBL Hemo ID  
21 Quad Plate (BD Diagnostics) and CHROMagar Candida (BD Diagnostics).

22 <sup>m</sup> GNGB, Fastidious gram-negative coccobacilli.

23 <sup>n</sup> GPR, Gram-positive rod.

24 <sup>o</sup> Anaerobic GN, Anaerobic gram-negative bacteria.

25 <sup>p</sup> Anaerobic GP, Anaerobic gram-positive bacteria.

26

27 SUPPLEMENTAL TABLE 2a Reagent costs to identify a single isolate of a species

| Species or<br>species-group | Isolates encountered<br>in study | Reagents consumed in study  |                 |                     | Cost<br>(US \$) |
|-----------------------------|----------------------------------|-----------------------------|-----------------|---------------------|-----------------|
|                             |                                  | (cost per reagent in US \$) |                 |                     |                 |
|                             |                                  | Catalase                    | LA <sup>a</sup> | PHX <sup>b</sup>    |                 |
|                             |                                  | (0.0005)                    | (0.81)          | (1.27) <sup>c</sup> |                 |
| <i>S. aureus</i>            | 100                              | 28                          | 103             | 102                 |                 |
| Total Cost of 100 isolates  |                                  | 0.014                       | 83.43           | 129.54              | 212.98          |
| <b>Cost per isolate</b>     |                                  |                             |                 |                     | <b>2.13</b>     |

28 <sup>a</sup> LA, latex agglutination kit.

29 <sup>b</sup> PHX, Phoenix microbial identification system.

30 <sup>c</sup> This price is the cost difference between the “Combined Identification plus Susceptibility” and  
 31 the “Susceptibility only” panels.

32 SUPPLEMENTAL TABLE 2b Hands-on labor-time to identify a single isolate of a species

| Species or<br>species-group            | Isolates encountered<br>in study | Reagents consumed in study          |                 |                     | Time<br>(min:sec) |
|----------------------------------------|----------------------------------|-------------------------------------|-----------------|---------------------|-------------------|
|                                        |                                  | (labor-time per reagent in min:sec) |                 |                     |                   |
|                                        |                                  | Catalase                            | LA <sup>a</sup> | PHX <sup>b</sup>    |                   |
|                                        |                                  | (0:10)                              | (0:30)          | (0:00) <sup>a</sup> |                   |
| <i>S. aureus</i>                       | 100                              | 28                                  | 103             | 102                 |                   |
| Hands on labor-time for 100 isolates   |                                  | 4:40                                | 51:30           | 0:00                | 56:10             |
| <b>Hands on labor-time per isolate</b> |                                  |                                     |                 |                     | <b>00:34</b>      |

33 <sup>a</sup> LA, latex agglutination kit.

34 <sup>b</sup> PHX, Phoenix microbial identification system.

35 <sup>c</sup> No labor-time savings expected as the “Susceptibility only” panel still needs to be performed.

36 SUPPLEMENTAL TABLE 3 Time-to-identification (TTI) by MALDI- and standard-protocol by organism-group

| Organism-<br>group       | n   | Proportion identified by number of days of workup |      |      |      |      |     |      |      |        |                    |      |      |      |      |     |     |        |        | <i>p</i> -value |
|--------------------------|-----|---------------------------------------------------|------|------|------|------|-----|------|------|--------|--------------------|------|------|------|------|-----|-----|--------|--------|-----------------|
|                          |     | Standard-protocol TTI                             |      |      |      |      |     |      |      |        | MALDI-protocol TTI |      |      |      |      |     |     |        |        |                 |
|                          |     | 0                                                 | 1    | 2    | 3    | 4    | 5   | 6    | >6   | Mean   | Media              | 0    | 1    | 2    | 3    | 4   | 5   | Mean   | Media  |                 |
|                          |     | (%)                                               | (%)  | (%)  | (%)  | (%)  | (%) | (%)  | (%)  | (days) | (days)             | (%)  | (%)  | (%)  | (%)  | (%) | (%) | (days) | (days) |                 |
| <i>S. aureus</i>         | 109 |                                                   | 64.2 | 32.1 | 2.8  | 0.9  |     |      |      | 1.40   | 1                  | 94.5 | 5.5  |      |      |     |     | 0.06   | 0      | <0.001          |
| Other Staph <sup>a</sup> | 26  | 3.8                                               | 57.7 | 26.9 | 11.5 |      |     |      |      | 1.46   | 1                  | 76.9 | 19.2 | 3.8  |      |     |     | 0.27   | 0      | <0.001          |
| BHS <sup>b</sup>         | 72  | 26.4                                              | 70.8 | 2.8  |      |      |     |      |      | 0.76   | 1                  | 83.3 | 16.7 |      |      |     |     | 0.17   | 0      | <0.001          |
| VGS <sup>c</sup>         | 7   |                                                   | 28.6 | 28.6 | 28.6 | 14.3 |     |      |      | 2.29   | 2                  |      | 42.9 | 42.9 | 14.3 |     |     | 1.71   | 2      | 0.046           |
| <i>S. anginosus</i>      | 17  | 5.9                                               | 58.8 | 11.8 | 23.5 |      |     |      |      | 1.53   | 1                  | 64.7 | 29.4 | 5.9  |      |     |     | 0.41   | 0      | 0.002           |
| <i>S. pneumoniae</i>     | 6   | 16.7                                              | 83.3 |      |      |      |     |      |      | 0.83   | 1                  | 50.0 | 50.0 |      |      |     |     | 0.50   | 0.5    | 0.157           |
| Other GPC <sup>d</sup>   | 6   | 16.7                                              | 16.7 | 33.3 |      |      |     | 33.3 | 4.17 | 2      | 50.0               | 16.7 | 33.3 |      |      |     |     | 0.83   | 0.5    | 0.052           |
| <i>Enterococcus</i>      | 78  |                                                   | 43.6 | 39.7 | 12.8 | 1.3  | 2.6 |      |      | 1.79   | 2                  | 84.6 | 15.4 |      |      |     |     | 0.15   | 0      | <0.001          |

|                        |     |      |      |      |      |      |      |      |      |      |      |      |      |      |        |        |   |       |
|------------------------|-----|------|------|------|------|------|------|------|------|------|------|------|------|------|--------|--------|---|-------|
| sp.                    |     |      |      |      |      |      |      |      |      |      |      |      |      |      |        |        |   |       |
| Enterobacteriaceae     | 284 | 69.4 | 25.4 | 2.8  | 1.1  | 0.4  | 1.1  | 1.41 | 1    | 93.0 | 7.0  |      | 0.07 | 0    | <0.001 |        |   |       |
| <i>P. aeruginosa</i>   | 77  | 33.8 | 51.9 | 7.8  | 1.3  | 2.6  | 2.6  | 1.95 | 2    | 87.0 | 13.0 |      | 0.13 | 0    | <0.001 |        |   |       |
| Other NF               | 39  | 28.2 | 38.5 | 5.1  | 7.7  | 10.3 | 7.7  | 2.6  | 2.82 | 2    | 82.1 | 12.8 | 5.1  | 0.23 | 0      | <0.001 |   |       |
| GNB <sup>e</sup>       |     |      |      |      |      |      |      |      |      |      |      |      |      |      |        |        |   |       |
| <i>Haemophilus</i>     | 10  | 80.0 |      | 20.0 |      |      |      | 1.40 | 1    | 100  |      |      |      | 0.00 | 0      | 0.003  |   |       |
| sp.                    |     |      |      |      |      |      |      |      |      |      |      |      |      |      |        |        |   |       |
| Other GN <sup>f</sup>  | 7   | 85.7 | 14.3 |      |      |      |      | 0.14 | 0    | 100  |      |      |      | 0.00 | 0      | 0.317  |   |       |
| <i>Corynebacterium</i> | 9   | 22.2 | 33.3 | 22.2 |      | 11.1 | 11.1 | 1.78 | 1    | 88.9 | 11.1 |      |      | 0.11 | 0      | 0.012  |   |       |
| <i>ium</i> sp.         |     |      |      |      |      |      |      |      |      |      |      |      |      |      |        |        |   |       |
| Other GPR <sup>g</sup> | 8   | 12.5 | 12.5 |      | 12.5 | 12.5 |      | 12.5 | 37.5 | 6.00 | 5    | 37.5 | 37.5 | 12.5 | 12.5   | 1.88   | 2 | 0.049 |
| Anaerobic              | 26  |      | 65.4 | 7.7  | 23.1 |      | 3.8  | 2.69 | 2    | 92.3 | 7.7  |      |      | 0.15 | 0      | <0.001 |   |       |
| GN <sup>h</sup>        |     |      |      |      |      |      |      |      |      |      |      |      |      |      |        |        |   |       |
| Anaerobic              | 14  | 14.3 | 21.4 | 28.6 | 7.1  | 7.1  |      | 21.4 | 3.07 | 2    | 71.4 | 14.3 | 14.3 | 0.43 | 0      | 0.002  |   |       |
| GP <sup>i</sup>        |     |      |      |      |      |      |      |      |      |      |      |      |      |      |        |        |   |       |

|                    |            |            |             |             |            |            |            |            |            |             |          |             |             |            |            |            |            |             |          |                  |
|--------------------|------------|------------|-------------|-------------|------------|------------|------------|------------|------------|-------------|----------|-------------|-------------|------------|------------|------------|------------|-------------|----------|------------------|
| <i>C. albicans</i> | 52         | 96.2       | 1.9         |             | 1.9        |            |            |            | 0.08       | 0           | 96.2     | 3.8         |             |            |            |            | 0.04       | 0           | 0.984    |                  |
| Other              | 56         | 3.6        | 64.3        | 14.3        | 5.4        | 1.8        | 5.4        |            | 5.4        | 2.11        | 1        | 83.9        | 14.3        | 1.8        |            |            | 0.18       | 0           | <0.001   |                  |
| <i>Candida</i> sp. |            |            |             |             |            |            |            |            |            |             |          |             |             |            |            |            |            |             |          |                  |
| Other yeasts       | 8          |            | 25.0        | 25.0        | 25.0       |            |            |            | 25.0       | 4.00        | 3.5      | 75.0        | 25.0        |            |            |            | 0.25       | 0           | 0.011    |                  |
| <b>All</b>         | <b>911</b> | <b>9.4</b> | <b>52.1</b> | <b>26.5</b> | <b>5.5</b> | <b>2.4</b> | <b>1.4</b> | <b>1.1</b> | <b>1.5</b> | <b>1.61</b> | <b>1</b> | <b>87.2</b> | <b>10.6</b> | <b>1.9</b> | <b>0.1</b> | <b>0.1</b> | <b>0.1</b> | <b>0.16</b> | <b>0</b> | <b>&lt;0.001</b> |

### organisms

- 
- 37 <sup>a</sup> Other Staph, Staphylococci other than *S. aureus*.
- 38 <sup>b</sup> BHS, Beta-hemolytic *Streptococcus*.
- 39 <sup>c</sup> VGS, Viridans-group *Streptococcus*.
- 40 <sup>d</sup> GPC, Gram-positive cocci.
- 41 <sup>e</sup> NF GNB, Glucose non-fermenting gram-negative bacilli.
- 42 <sup>f</sup> GNGB, Fastidious gram-negative coccobacilli.
- 43 <sup>g</sup> GPR, Gram-positive rod.
- 44 <sup>h</sup> Anaerobic GN, Anaerobic gram-negative bacteria.
- 45 <sup>i</sup> Anaerobic GP, Anaerobic gram-positive bacteria.



46 SUPPLEMENTAL TABLE 4 Per-test cost of MALDI-protocol

| <b>Item</b>                                        | <b>Cost per unit</b> | <b>Notes</b>                                                                           |
|----------------------------------------------------|----------------------|----------------------------------------------------------------------------------------|
|                                                    | <b>(US \$)</b>       |                                                                                        |
| Matrix                                             | 0.083 per spot       | While 250µl available per vial, measured<br>~170µl recovered per vial during the study |
| DTP <sup>a</sup> in duplicate<br>(includes Matrix) | 0.36 for 2 smears    | Cost of toothpick & pipette tips                                                       |
| FEP <sup>b</sup> in duplicate<br>(includes Matrix) | 0.62 for 2 spots     | Cost of toothpick, pipette tips, and chemical reagents                                 |

47 <sup>a</sup> DTP, Direct Transfer Procedure.

48 <sup>b</sup> FEP, Formic-acid Extraction Procedure.

49

## 50 SUPPLEMENTAL TABLE 5 Fixed annual costs of MALDI-protocol

| <b>Item</b>                           | <b>Cost calculation</b>                                                                                   | <b>Cost per year</b> | <b>Notes</b>                                                                           |
|---------------------------------------|-----------------------------------------------------------------------------------------------------------|----------------------|----------------------------------------------------------------------------------------|
|                                       |                                                                                                           | <b>(US \$)</b>       |                                                                                        |
| BTS <sup>a</sup><br>(includes Matrix) | (\$1.19 per spot) x<br>(2 spots per target) x<br>(9 targets per day)                                      | 7,846                | While 50µl available per vial,<br>measured 45µl recovered per vial<br>during the study |
| Target cleaning                       | (\$0.31 per target) x<br>(9 targets per day)                                                              | 1,014                | Includes costs of pipette tips                                                         |
| Instrument<br>servicing               | \$26,000 in 2 <sup>nd</sup> year<br>5% increase per year<br>from 3 <sup>rd</sup> to 5 <sup>th</sup> years | 22,413               | Average in the first 5 years.                                                          |
| <b>Total</b>                          |                                                                                                           | <b>31,273</b>        |                                                                                        |

51 <sup>a</sup> BTS, bacterial test standard.
